# Supplementary material for: Bacterial Community Diversity and Bacterial Interaction Network in Eight Mosquito Species
Source: MDPI journal article supplement (doi:10.3390/genes13112052), 2022-11-07
Supplement: s1 [file s1]

# **Bacterial Community Diversity and Bacterial Interaction Networks in Eight Mosquito Species**

**Authors:** Herculano da Silva, Tatiane M. P. Oliveira, Maria Anice M. Sallum

Departamento de Epidemiologia, Faculdade de Saúde Pública, Universidade de São Paulo, Avenida Doutor Arnaldo 715, São Paulo 01246-904, SP, Brasil

## **Supplementary Materials**

### **Figure legends**

**Figure S1:** Bar graph depicting the bacterial amplicon sequence variants (ASV) composition at the highest taxonomic level (phylum) for each mosquito sample.

**Figure S2:** Bar graph depicting the bacterial amplicon sequence variants (ASV) composition at the bottom taxonomic level (genus) for each mosquito sample.

**Figure S3:** Rarefaction curve. Count of ASVs per given sequencing depth in each mosquito sample. Each line corresponds to a mosquito sample.

**Figure S4:** The illustration represents ANCOM analysis. Twelve taxa were the most abundant and are marked 1 to 12 from right to left.

**Figure S5:** Heatmap of bacterial sequences with taxonomic assignment to genus level in each mosquito sample. Each row represents a bacterial taxon and each column corresponds a mosquito species. Abundance data are assigned colours across a gradient from yellow (higher bacterial abundance) to blue (lowest bacterial abundance).

## **Table legends**

**Table S1:** Count of 16S rRNA raw data and contigs in each mosquito sample.

**Table S2:** ASVs count in each sample and mosquito species.

**Table S3:** Shannon index of each mosquito sample.

**Table S4:** Pairwise permanova results from unweighted and weighted Unifrac distances.

**Table S5:** ANCOM analysis. Percentile abundances of features by group.

**Table S6:** Relative abundance of each ASV in each mosquito species.

**Table S7:** Number of bacterial interactions per mosquito species and number of bacterial taxa related to interactions.
